# Supplementary material
Source: PubMed Central journal article supplement (PMC10244119)
Supplement: ajcr0013-2013-f7.pdf [file ajcr0013-2013-f7.pdf]

*P. gingivalis* aggravates ESCC

**Table S2.** Clinicopathological characteristics of 190 ESCCs

| Name | Gender | Age | Differentiation | Invasion depth | Lymphatic metastasis | status | days  | TGFβ1 | pSmad2 | GARP | P.gingivalis | TNM |
|------|--------|-----|-----------------|----------------|----------------------|--------|-------|-------|--------|------|--------------|-----|
| XXX  | 0      | 1   | 2               | 2              | 0                    | 1      | 50    | 0     | 0      | 0    | 0            | 0   |
| XXX  | 1      | 1   | 2               | 2              | 0                    | 1      | 10    | 0     | 1      | 1    | 1            | 0   |
| XXX  | 1      | 1   | 3               | 2              | 1                    | 1      | 32    | 0     | 1      | 1    | 1            | 1   |
| XXX  | 1      | 0   | 2               | 1              | 0                    | 0      | 15    | 0     | 0      | 0    | 0            | 0   |
| XXX  | 0      | 1   | 1               | 1              | 0                    | 0      | 72    | 1     | 0      | 1    | 0            | 0   |
| XXX  | 1      | 1   | 2               | 2              | 1                    | 0      | 72    | 1     | 0      | 1    | 1            | 1   |
| XXX  | 1      | 1   | 2               | 1              | 0                    | 1      | 21    | 0     | 1      | 1    | 0            | 0   |
| XXX  | 0      | 1   | 1               | 1              | 0                    | 0      | 43    | 0     | 0      | 0    | 0            | 0   |
| XXX  | 1      | 0   | 2               | 2              | 0                    | 1      | 7     | 1     | 1      | 1    | 1            | 0   |
| XXX  | 0      | 0   | 2               | 1              | 0                    | 0      | 72    | 1     | 0      | 1    | 0            | 0   |
| XXX  | 0      | 1   | 1               | 2              | 0                    | 1      | 63    | 0     | 0      | 1    | 1            | 0   |
| XXX  | 1      | 0   | 2               | 2              | 1                    | 0      | 66    | 0     | 0      | 0    | 0            | 0   |
| XXX  | 0      | 0   | 3               | 1              | 1                    | 0      | 55.9  | 0     | 0      | 0    | 0            | 0   |
| XXX  | 1      | 1   | 3               | 2              | 1                    | 1      | 4     | 0     | 1      | 1    | 1            | 1   |
| XXX  | 0      | 0   | 2               | 2              | 0                    | 0      | 61.9  | 0     | 0      | 0    | 0            | 0   |
| XXX  | 0      | 1   | 3               | 2              | 1                    | 1      | 12.2  | 0     | 1      | 1    | 1            | 1   |
| XXX  | 1      | 0   | 2               | 1              | 0                    | 1      | 30    | 0     | 0      | 0    | 1            | 0   |
| XXX  | 0      | 1   | 2               | 1              | 0                    | 1      | 42    | 1     | 0      | 0    | 0            | 0   |
| XXX  | 1      | 0   | 1               | 2              | 1                    | 0      | 12    | 0     | 0      | 1    | 0            | 1   |
| XXX  | 1      | 1   | 2               | 2              | 0                    | 0      | 25    | 0     | 1      | 1    | 0            | 0   |
| XXX  | 0      | 1   | 3               | 2              | 1                    | 1      | 11    | 1     | 1      | 0    | 1            | 1   |
| XXX  | 1      | 0   | 2               | 1              | 1                    | 0      | 44    | 0     | 0      | 1    | 0            | 0   |
| XXX  | 1      | 0   | 2               | 2              | 0                    | 0      | 18    | 1     | 0      | 0    | 1            | 0   |
| XXX  | 1      | 1   | 3               | 2              | 0                    | 0      | 20    | 0     | 0      | 0    | 0            | 0   |
| XXX  | 1      | 1   | 3               | 2              | 0                    | 1      | 24    | 1     | 1      | 1    | 1            | 0   |
| XXX  | 0      | 1   | 2               | 1              | 0                    | 1      | 30    | 1     | 1      | 0    | 1            | 0   |
| XXX  | 1      | 1   | 2               | 1              | 0                    | 1      | 32    | 0     | 0      | 0    | 0            | 0   |
| XXX  | 1      | 1   | 2               | 1              | 0                    | 1      | 23    | 1     | 0      | 1    | 0            | 0   |
| XXX  | 0      | 1   | 2               | 1              | 0                    | 1      | 24    | 1     | 0      | 0    | 0            | 0   |
| XXX  | 1      | 1   | 3               | 2              | 0                    | 0      | 72    | 1     | 1      | 0    | 0            | 0   |
| XXX  | 1      | 1   | 2               | 2              | 0                    | 1      | 51    | 0     | 1      | 1    | 0            | 0   |
| XXX  | 1      | 1   | 1               | 1              | 0                    | 1      | 32    | 1     | 1      | 0    | 0            | 0   |
| XXX  | 1      | 0   | 1               | 2              | 0                    | 0      | 24    | 0     | 0      | 0    | 0            | 0   |
| XXX  | 0      | 1   | 2               | 1              | 0                    | 1      | 10.1  | 1     | 1      | 0    | 0            | 0   |
| XXX  | 1      | 1   | 2               | 2              | 1                    | 1      | 24.9  | 0     | 0      | 1    | 0            | 1   |
| XXX  | 1      | 1   | 1               | 1              | 0                    | 1      | 37    | 1     | 0      | 1    | 0            | 0   |
| XXX  | 1      | 1   | 1               | 2              | 0                    | 0      | 23    | 1     | 1      | 0    | 0            | 0   |
| XXX  | 0      | 1   | 2               | 1              | 0                    | 0      | 61.87 | 1     | 1      | 0    | 0            | 0   |
| XXX  | 1      | 1   | 2               | 1              | 1                    | 1      | 17    | 1     | 1      | 1    | 1            | 1   |
| XXX  | 1      | 1   | 3               | 2              | 1                    | 0      | 24    | 0     | 0      | 0    | 1            | 1   |
| XXX  | 1      | 1   | 2               | 2              | 1                    | 0      | 72    | 1     | 0      | 0    | 1            | 1   |
| XXX  | 1      | 1   | 3               | 2              | 1                    | 0      | 21    | 1     | 0      | 1    | 1            | 1   |
| XXX  | 1      | 0   | 1               | 1              | 1                    | 0      | 43    | 1     | 0      | 1    | 0            | 0   |
| XXX  | 1      | 0   | 2               | 2              | 1                    | 1      | 12    | 1     | 0      | 0    | 1            | 1   |
| XXX  | 1      | 1   | 3               | 2              | 1                    | 0      | 20    | 0     | 0      | 0    | 1            | 1   |
| XXX  | 0      | 0   | 3               | 2              | 0                    | 0      | 56.85 | 0     | 1      | 1    | 1            | 0   |
| XXX  | 1      | 0   | 3               | 2              | 1                    | 0      | 20    | 1     | 1      | 1    | 1            | 1   |
| XXX  | 0      | 0   | 2               | 2              | 0                    | 0      | 58.89 | 1     | 0      | 0    | 1            | 0   |
| XXX  | 0      | 1   | 3               | 2              | 0                    | 0      | 22    | 0     | 1      | 0    | 0            | 0   |

*P. gingivalis* aggravates ESCC

|     |   |   |   |   |   |   |       |   |   |   |   |   |
|-----|---|---|---|---|---|---|-------|---|---|---|---|---|
| XXX | 1 | 1 | 2 | 2 | 1 | 1 | 29    | 1 | 1 | 1 | 1 | 1 |
| XXX | 1 | 1 | 1 | 1 | 1 | 1 | 42    | 0 | 1 | 1 | 1 | 0 |
| XXX | 0 | 1 | 2 | 2 | 1 | 0 | 19    | 0 | 1 | 0 | 0 | 1 |
| XXX | 1 | 1 | 3 | 2 | 0 | 0 | 18    | 1 | 1 | 0 | 0 | 0 |
| XXX | 1 | 0 | 2 | 2 | 0 | 1 | 18.3  | 1 | 1 | 0 | 1 | 0 |
| XXX | 0 | 1 | 1 | 2 | 0 | 0 | 58.89 | 0 | 0 | 0 | 0 | 0 |
| XXX | 0 | 1 | 1 | 1 | 0 | 1 | 72    | 0 | 1 | 1 | 0 | 1 |
| XXX | 1 | 1 | 3 | 1 | 1 | 1 | 33    | 1 | 0 | 1 | 1 | 0 |
| XXX | 0 | 1 | 2 | 1 | 0 | 0 | 43    | 0 | 1 | 0 | 0 | 0 |
| XXX | 0 | 0 | 1 | 2 | 0 | 0 | 59.9  | 0 | 1 | 0 | 0 | 0 |
| XXX | 1 | 1 | 2 | 2 | 0 | 0 | 23    | 0 | 0 | 0 | 0 | 0 |
| XXX | 0 | 0 | 1 | 2 | 1 | 1 | 32    | 0 | 1 | 1 | 1 | 1 |
| XXX | 0 | 1 | 3 | 1 | 1 | 0 | 23    | 0 | 0 | 1 | 1 | 0 |
| XXX | 1 | 0 | 2 | 1 | 1 | 1 | 38    | 0 | 1 | 0 | 1 | 1 |
| XXX | 1 | 0 | 2 | 2 | 1 | 1 | 2     | 0 | 1 | 1 | 1 | 1 |
| XXX | 1 | 0 | 2 | 2 | 0 | 1 | 18.92 | 0 | 1 | 1 | 0 | 0 |
| XXX | 0 | 1 | 2 | 1 | 0 | 0 | 20    | 0 | 1 | 0 | 1 | 0 |
| XXX | 1 | 1 | 2 | 1 | 0 | 1 | 30    | 0 | 1 | 1 | 0 | 0 |
| XXX | 0 | 1 | 1 | 1 | 0 | 1 | 29    | 0 | 0 | 0 | 0 | 0 |
| XXX | 1 | 1 | 2 | 1 | 1 | 1 | 9.9   | 0 | 1 | 1 | 0 | 1 |
| XXX | 1 | 0 | 2 | 1 | 0 | 0 | 43    | 0 | 0 | 0 | 0 | 0 |
| XXX | 1 | 0 | 2 | 1 | 1 | 1 | 28    | 0 | 1 | 1 | 1 | 0 |
| XXX | 0 | 0 | 1 | 2 | 1 | 1 | 56    | 0 | 1 | 1 | 1 | 1 |
| XXX | 0 | 0 | 2 | 1 | 1 | 1 | 14.9  | 1 | 1 | 1 | 1 | 0 |
| XXX | 0 | 1 | 2 | 1 | 0 | 0 | 56.85 | 1 | 0 | 1 | 1 | 0 |
| XXX | 1 | 0 | 2 | 1 | 1 | 1 | 29    | 1 | 1 | 1 | 1 | 1 |
| XXX | 1 | 1 | 2 | 1 | 1 | 1 | 17    | 0 | 0 | 1 | 1 | 1 |
| XXX | 1 | 1 | 2 | 2 | 1 | 1 | 27    | 0 | 0 | 0 | 0 | 1 |
| XXX | 1 | 0 | 3 | 1 | 0 | 0 | 56.85 | 0 | 1 | 1 | 0 | 0 |
| XXX | 0 | 1 | 2 | 1 | 1 | 1 | 13    | 0 | 0 | 0 | 1 | 0 |
| XXX | 1 | 1 | 1 | 1 | 1 | 1 | 37    | 1 | 0 | 1 | 1 | 1 |
| XXX | 0 | 1 | 2 | 2 | 0 | 1 | 10    | 1 | 0 | 1 | 0 | 0 |
| XXX | 1 | 1 | 2 | 2 | 0 | 1 | 10    | 1 | 1 | 1 | 1 | 0 |
| XXX | 0 | 1 | 1 | 1 | 0 | 1 | 53.93 | 0 | 1 | 0 | 0 | 0 |
| XXX | 0 | 1 | 2 | 2 | 0 | 0 | 72    | 0 | 0 | 1 | 0 | 0 |
| XXX | 0 | 1 | 2 | 1 | 1 | 1 | 38    | 1 | 0 | 0 | 1 | 1 |
| XXX | 1 | 0 | 3 | 1 | 1 | 0 | 22    | 0 | 1 | 0 | 0 | 0 |
| XXX | 1 | 0 | 2 | 2 | 0 | 0 | 63.8  | 1 | 0 | 1 | 0 | 0 |
| XXX | 1 | 1 | 1 | 1 | 0 | 0 | 43    | 1 | 1 | 1 | 1 | 0 |
| XXX | 1 | 0 | 1 | 1 | 1 | 0 | 43    | 1 | 0 | 1 | 1 | 1 |
| XXX | 1 | 0 | 2 | 2 | 1 | 0 | 72    | 0 | 0 | 1 | 1 | 1 |
| XXX | 1 | 1 | 2 | 1 | 0 | 0 | 62.9  | 0 | 1 | 0 | 0 | 0 |
| XXX | 0 | 1 | 1 | 1 | 0 | 0 | 23    | 0 | 1 | 1 | 0 | 0 |
| XXX | 1 | 0 | 1 | 1 | 0 | 0 | 12    | 0 | 1 | 0 | 0 | 0 |
| XXX | 1 | 1 | 2 | 1 | 1 | 0 | 42    | 0 | 0 | 0 | 0 | 1 |
| XXX | 0 | 1 | 2 | 1 | 0 | 1 | 23    | 0 | 1 | 1 | 0 | 0 |
| XXX | 1 | 0 | 2 | 1 | 1 | 1 | 21.2  | 0 | 1 | 1 | 0 | 0 |
| XXX | 1 | 1 | 2 | 2 | 1 | 0 | 22    | 1 | 0 | 1 | 1 | 1 |
| XXX | 1 | 1 | 2 | 1 | 0 | 0 | 42    | 1 | 1 | 0 | 0 | 0 |
| XXX | 1 | 1 | 2 | 1 | 0 | 1 | 28    | 1 | 0 | 0 | 0 | 0 |
| XXX | 1 | 1 | 3 | 2 | 0 | 0 | 24    | 1 | 1 | 0 | 0 | 0 |
| XXX | 1 | 1 | 3 | 1 | 0 | 1 | 6     | 0 | 1 | 1 | 1 | 0 |

*P. gingivalis* aggravates ESCC

|     |   |   |   |   |   |   |       |   |   |   |   |   |
|-----|---|---|---|---|---|---|-------|---|---|---|---|---|
| XXX | 0 | 0 | 2 | 1 | 0 | 0 | 56.85 | 0 | 1 | 1 | 0 | 0 |
| XXX | 0 | 1 | 2 | 2 | 0 | 0 | 21    | 0 | 1 | 1 | 0 | 0 |
| XXX | 1 | 1 | 3 | 2 | 0 | 0 | 20    | 1 | 1 | 0 | 0 | 0 |
| XXX | 1 | 1 | 3 | 2 | 1 | 1 | 26    | 1 | 0 | 0 | 0 | 1 |
| XXX | 0 | 1 | 2 | 2 | 1 | 1 | 41.9  | 1 | 0 | 1 | 0 | 1 |
| XXX | 1 | 1 | 1 | 2 | 1 | 1 | 48    | 0 | 0 | 1 | 1 | 1 |
| XXX | 0 | 0 | 1 | 2 | 1 | 1 | 0.5   | 0 | 0 | 1 | 1 | 1 |
| XXX | 1 | 1 | 2 | 2 | 1 | 1 | 52    | 1 | 1 | 1 | 1 | 1 |
| XXX | 1 | 0 | 3 | 1 | 1 | 1 | 31    | 0 | 0 | 0 | 0 | 1 |
| XXX | 1 | 0 | 1 | 1 | 0 | 0 | 43    | 0 | 1 | 1 | 0 | 0 |
| XXX | 1 | 0 | 1 | 2 | 1 | 1 | 40    | 1 | 1 | 1 | 1 | 1 |
| XXX | 1 | 1 | 3 | 2 | 0 | 1 | 29    | 0 | 1 | 1 | 1 | 0 |
| XXX | 0 | 1 | 2 | 2 | 0 | 1 | 11    | 1 | 0 | 0 | 0 | 0 |
| XXX | 1 | 0 | 2 | 1 | 0 | 0 | 43    | 0 | 1 | 1 | 0 | 0 |
| XXX | 1 | 1 | 2 | 1 | 1 | 0 | 43    | 0 | 0 | 0 | 0 | 1 |
| XXX | 0 | 1 | 1 | 1 | 0 | 1 | 33    | 0 | 0 | 0 | 1 | 0 |
| XXX | 0 | 1 | 2 | 1 | 0 | 1 | 16.9  | 1 | 0 | 1 | 0 | 0 |
| XXX | 0 | 0 | 2 | 2 | 1 | 1 | 64    | 1 | 1 | 0 | 1 | 1 |
| XXX | 1 | 1 | 3 | 1 | 0 | 1 | 3.1   | 0 | 1 | 0 | 1 | 0 |
| XXX | 0 | 1 | 2 | 2 | 0 | 1 | 5.1   | 0 | 0 | 0 | 0 | 0 |
| XXX | 1 | 1 | 1 | 1 | 1 | 1 | 23    | 0 | 0 | 0 | 0 | 1 |
| XXX | 1 | 1 | 1 | 2 | 0 | 0 | 72    | 0 | 1 | 0 | 0 | 0 |
| XXX | 0 | 0 | 2 | 2 | 0 | 0 | 23    | 0 | 1 | 0 | 0 | 0 |
| XXX | 1 | 0 | 1 | 2 | 0 | 1 | 13    | 0 | 1 | 1 | 1 | 0 |
| XXX | 1 | 1 | 2 | 1 | 1 | 0 | 43    | 0 | 0 | 0 | 0 | 1 |
| XXX | 1 | 1 | 3 | 2 | 0 | 0 | 23    | 0 | 1 | 0 | 1 | 0 |
| XXX | 1 | 0 | 2 | 1 | 0 | 0 | 59.87 | 0 | 1 | 0 | 1 | 0 |
| XXX | 1 | 0 | 2 | 1 | 0 | 0 | 41    | 1 | 1 | 1 | 1 | 0 |
| XXX | 1 | 0 | 2 | 2 | 1 | 0 | 42    | 1 | 0 | 0 | 1 | 0 |
| XXX | 1 | 0 | 1 | 1 | 0 | 0 | 23    | 1 | 0 | 0 | 0 | 0 |
| XXX | 0 | 1 | 1 | 2 | 0 | 0 | 72    | 0 | 0 | 0 | 0 | 0 |
| XXX | 1 | 1 | 2 | 1 | 0 | 0 | 72    | 0 | 0 | 0 | 0 | 0 |
| XXX | 1 | 0 | 2 | 1 | 0 | 0 | 72    | 0 | 0 | 0 | 0 | 0 |
| XXX | 0 | 1 | 2 | 1 | 1 | 0 | 72    | 0 | 1 | 1 | 0 | 0 |
| XXX | 0 | 0 | 2 | 1 | 0 | 0 | 43    | 1 | 1 | 1 | 0 | 0 |
| XXX | 0 | 1 | 1 | 1 | 0 | 0 | 72    | 0 | 1 | 0 | 0 | 0 |
| XXX | 1 | 1 | 1 | 2 | 0 | 1 | 38    | 1 | 1 | 1 | 1 | 0 |
| XXX | 1 | 1 | 2 | 1 | 1 | 0 | 41    | 0 | 1 | 1 | 1 | 1 |
| XXX | 1 | 1 | 2 | 2 | 1 | 1 | 18    | 1 | 1 | 0 | 1 | 1 |
| XXX | 1 | 0 | 1 | 2 | 0 | 0 | 63.8  | 1 | 0 | 1 | 1 | 0 |
| XXX | 1 | 1 | 2 | 1 | 1 | 0 | 42    | 0 | 1 | 1 | 0 | 1 |
| XXX | 1 | 1 | 2 | 1 | 1 | 0 | 42    | 0 | 0 | 0 | 0 | 0 |
| XXX | 0 | 1 | 2 | 1 | 0 | 0 | 43    | 1 | 1 | 0 | 0 | 0 |
| XXX | 1 | 1 | 3 | 2 | 0 | 1 | 11    | 1 | 1 | 1 | 1 | 0 |
| XXX | 1 | 0 | 2 | 2 | 1 | 1 | 64    | 0 | 1 | 1 | 1 | 1 |
| XXX | 1 | 1 | 2 | 1 | 0 | 0 | 42    | 1 | 1 | 1 | 1 | 0 |
| XXX | 0 | 1 | 2 | 1 | 0 | 0 | 42    | 1 | 0 | 0 | 0 | 0 |
| XXX | 1 | 0 | 3 | 2 | 0 | 0 | 22    | 0 | 0 | 0 | 0 | 0 |
| XXX | 1 | 0 | 3 | 2 | 0 | 0 | 25    | 0 | 0 | 0 | 0 | 0 |
| XXX | 1 | 0 | 1 | 1 | 0 | 0 | 42    | 0 | 0 | 0 | 0 | 0 |
| XXX | 1 | 1 | 2 | 1 | 0 | 0 | 61.9  | 0 | 1 | 0 | 0 | 0 |
| XXX | 1 | 0 | 1 | 2 | 0 | 0 | 59.9  | 1 | 0 | 1 | 1 | 0 |

*P. gingivalis* aggravates ESCC

|     |   |   |   |   |   |   |       |   |   |   |   |   |
|-----|---|---|---|---|---|---|-------|---|---|---|---|---|
| XXX | 0 | 1 | 1 | 2 | 0 | 0 | 72    | 0 | 0 | 1 | 0 | 0 |
| XXX | 1 | 1 | 2 | 2 | 0 | 1 | 56.9  | 0 | 0 | 0 | 0 | 0 |
| XXX | 1 | 0 | 3 | 1 | 0 | 0 | 43    | 1 | 1 | 0 | 0 | 0 |
| XXX | 0 | 1 | 3 | 1 | 0 | 0 | 19    | 0 | 1 | 1 | 0 | 0 |
| XXX | 1 | 1 | 2 | 1 | 1 | 0 | 42    | 0 | 1 | 1 | 0 | 1 |
| XXX | 1 | 1 | 2 | 1 | 1 | 1 | 41    | 1 | 1 | 1 | 1 | 0 |
| XXX | 1 | 0 | 2 | 2 | 1 | 1 | 47    | 0 | 1 | 1 | 1 | 1 |
| XXX | 1 | 1 | 2 | 2 | 0 | 1 | 33.9  | 0 | 1 | 1 | 0 | 0 |
| XXX | 0 | 1 | 3 | 2 | 1 | 0 | 20    | 0 | 1 | 0 | 1 | 1 |
| XXX | 1 | 1 | 1 | 2 | 0 | 1 | 31.9  | 1 | 1 | 0 | 0 | 0 |
| XXX | 1 | 1 | 3 | 2 | 0 | 0 | 21    | 0 | 0 | 0 | 0 | 0 |
| XXX | 1 | 1 | 2 | 2 | 0 | 1 | 38.9  | 0 | 1 | 0 | 1 | 0 |
| XXX | 1 | 0 | 2 | 1 | 0 | 0 | 58.89 | 0 | 0 | 1 | 1 | 0 |
| XXX | 0 | 0 | 3 | 1 | 0 | 0 | 23    | 0 | 0 | 0 | 0 | 0 |
| XXX | 1 | 1 | 2 | 1 | 1 | 1 | 20    | 0 | 1 | 1 | 0 | 1 |
| XXX | 1 | 1 | 2 | 1 | 1 | 0 | 42    | 0 | 0 | 0 | 1 | 1 |
| XXX | 1 | 0 | 2 | 2 | 0 | 0 | 58.89 | 0 | 0 | 1 | 0 | 1 |
| XXX | 1 | 0 | 3 | 2 | 1 | 0 | 24    | 1 | 1 | 1 | 1 | 1 |
| XXX | 1 | 1 | 2 | 1 | 0 | 0 | 63.8  | 0 | 0 | 0 | 0 | 0 |
| XXX | 0 | 1 | 2 | 2 | 0 | 0 | 18    | 1 | 0 | 0 | 0 | 0 |
| XXX | 0 | 1 | 2 | 2 | 0 | 1 | 35    | 1 | 0 | 1 | 0 | 0 |
| XXX | 1 | 1 | 3 | 2 | 0 | 0 | 72    | 0 | 0 | 1 | 0 | 0 |
| XXX | 1 | 1 | 2 | 1 | 0 | 0 | 24    | 0 | 0 | 0 | 0 | 0 |
| XXX | 0 | 1 | 1 | 1 | 0 | 1 | 39.9  | 1 | 0 | 0 | 0 | 0 |
| XXX | 1 | 1 | 1 | 1 | 1 | 1 | 10    | 0 | 0 | 0 | 1 | 0 |
| XXX | 1 | 1 | 1 | 2 | 0 | 1 | 64    | 1 | 1 | 1 | 0 | 0 |
| XXX | 1 | 1 | 1 | 2 | 0 | 1 | 33    | 0 | 0 | 1 | 0 | 0 |
| XXX | 1 | 1 | 1 | 2 | 1 | 1 | 64    | 0 | 0 | 0 | 1 | 1 |
| XXX | 1 | 1 | 2 | 1 | 1 | 1 | 19    | 0 | 0 | 0 | 1 | 1 |
| XXX | 1 | 1 | 2 | 2 | 0 | 1 | 18    | 0 | 0 | 0 | 0 | 0 |
| XXX | 1 | 1 | 2 | 1 | 1 | 0 | 42    | 0 | 1 | 0 | 1 | 0 |
| XXX | 1 | 1 | 1 | 2 | 1 | 1 | 15    | 1 | 1 | 0 | 1 | 1 |
| XXX | 1 | 1 | 2 | 1 | 0 | 1 | 54    | 0 | 0 | 0 | 0 | 0 |
| XXX | 1 | 0 | 2 | 2 | 0 | 1 | 23.9  | 0 | 1 | 1 | 1 | 0 |
| XXX | 1 | 1 | 1 | 2 | 0 | 1 | 38    | 0 | 1 | 1 | 1 | 0 |
| XXX | 1 | 1 | 2 | 2 | 1 | 1 | 10    | 1 | 1 | 1 | 0 | 1 |
| XXX | 0 | 0 | 2 | 2 | 0 | 0 | 19    | 1 | 0 | 0 | 0 | 0 |

*P. gingivalis* aggravates ESCC

**Table S3.** Primer sequences used in this study

| Primer   | Sequence                 |
|----------|--------------------------|
| PAI-1/F  | CATAGTCTCAGCCCGCATGG     |
| PAI-1/R  | GGGTCAGGGTTCCATCACTT     |
| Smad7/F  | CCCCATCACCTTAGCCGACTCTGC |
| Smad7/R  | CCCAGGGGCCAGATAATTCGTTCC |
| SNAI1/F  | CCTGTCTGCGTGGGTTTTTG     |
| SNAI1/R  | ACCTGGGGGTGGATTATTGC     |
| Oct4/F   | CAAGCTCCTGAAGCAGAAGAGGAT |
| Oct4/R   | CTCACTCGGTTCTCGATACTGGTT |
| DAPK/F   | TGGGAAGCGGAGCTGAAGTG     |
| DAPK/R   | CACGGCATTCTTCCACAACCG    |
| BMF/F    | CCCTCCTCCAATCGAGTC       |
| BMF/R    | TCCCCATCCTCTGGTTGGAA     |
| CDKN2B/F | CAACGGAGTCAACCGTTTCG     |
| CDKN2B/R | GGGCAGCATCATGCACCG       |
| p21/F    | ACTCTCAGGGTCGAAAACGG     |
| p21/R    | ATGTAGAGCGGGCCTTTGAG     |
| BIM/F    | GCTACCAGATCCCCACTTTTCA   |
| BIM/R    | CTGGGCTCCTGTCTGTGT       |

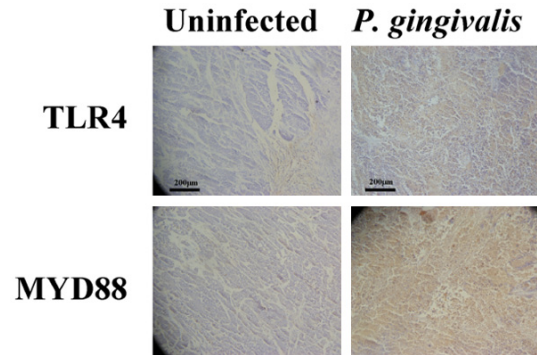

**Figure S1.** *P. gingivalis*-mediated upregulation of GARP enhances TGF $\beta$  activation through TLR4/MYD88 signaling. Representative images of IHC staining of TLR4 and MYD88 in NE6-T-derived xenograft tumors under different treatment conditions. Scale bars, 200  $\mu$ m.

*P. gingivalis* aggravates ESCC

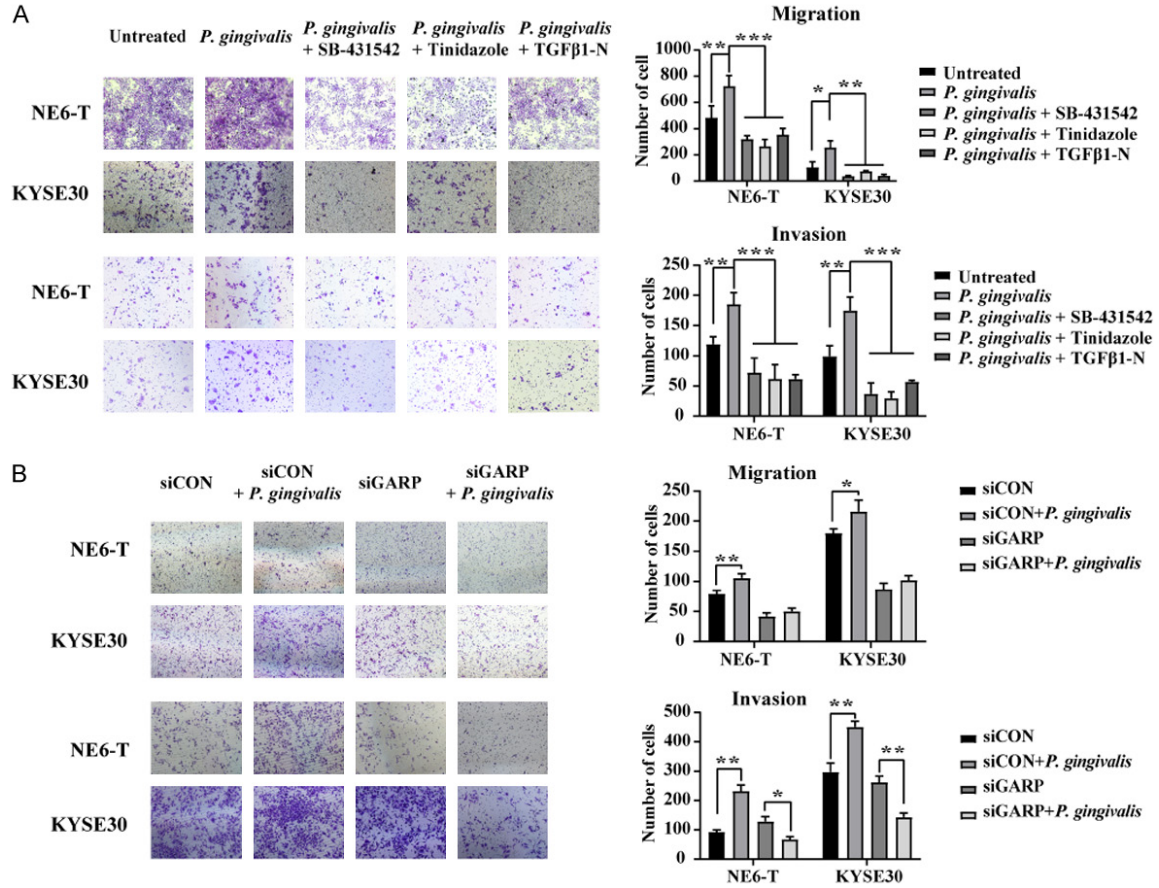

**Figure S2.** *P. gingivalis* enhances the migration and invasion of NE6-T and KYSE30 cells through GARP upregulation. A, B. Representative images and the quantitation of migration and invasion assay in NE6-T and KYSE30 cells under different treatment conditions. All experiments were independently repeated three times. The quantitation data were presented as means  $\pm$  SD from three independent experiment with a two-tailed Student's *t*-test for statistical analysis (\* $P < 0.05$ , \*\* $P < 0.01$ , and \*\*\* $P < 0.001$ ).
